# Supplementary material
Source: publisher figshare collection journal article supplement (https://rs.figshare.com/ndownloader/files/17486021)
Supplement: Supplementary file 1 [file 17486021]

**Electronic Supplementary Material: figures**

Figure S1. Larval habitat distribution across the Caudata. Tip labels are coloured as in Figure 2a. We used a Mk (k=3) symmetrical Markov model of ancestor rate reconstruction (Lewis 2001; with equal weight priors), and depict relative support “pies” for the most inclusive nodes with strong support, as well as the deepest 63 nodes.

Figure S2. Simulated mean differences in genome size (*pg*) across breeding habitat under independent evolution of genome and breeding habitat across each of the 20 trees. Red lines indicate observed mean difference from our empirical data.

Figure S3. Simulated evolutionary transition rates (q) across 20 large genome size sub-trees (n = 138 species for each tree). Red lines indicate our mean observed values from empirical data.

Figure S4. Distribution of p-values (the probability of observing our empirical values by chance) for the simulated mean differences in genome size (*pg*) between breeding habitats (*a*) and among simulated evolutionary transition rates (*b*) from each of the 20 trees.
